1 **Staphylococcal Enterotoxin C promotes *Staphylococcus aureus* Infective Endocarditis**  
2 **Independent of Superantigen Activity**

3

4 Kyle J. Kinney<sup>1</sup>, Phuong M. Tran<sup>1,3</sup>, Katherine N. Gibson-Corley<sup>2</sup>, Ana N. Forsythe<sup>1</sup>, Katarina  
5 Kulhankova<sup>1</sup>, Wilmara Salgado-Pabón<sup>3\*</sup>

6

7 <sup>1</sup>Department of Microbiology and Immunology, University of Iowa Carver College of Medicine,  
8 Iowa City, Iowa, USA. <sup>2</sup>Department of Pathology, University of Iowa Carver College of  
9 Medicine, Iowa City, Iowa, USA. <sup>3</sup>Department of Pathobiological Sciences, University of  
10 Wisconsin-Madison, Madison, Wisconsin, USA. \*corresponding author: [walgado@wisc.edu](mailto:walgado@wisc.edu)

11 **Abstract**

12 The superantigen (SAG) staphylococcal enterotoxin C (SEC) is critical for *Staphylococcus*  
13 *aureus* infective endocarditis (SAIE) as tested in rabbits. Its hallmark function and most potent  
14 biological activity is hyperactivation of the adaptive immune system. Superantigenicity was  
15 proposed as a major underlying mechanism driving SAIE but was not directly tested. With the  
16 use of *S. aureus* MW2 expressing SEC toxoids, we show that superantigenicity does not  
17 contribute to vegetation growth, to the magnitude of myocardial inflammation or to acute kidney  
18 injury. In contrast, superantigenicity contributes to hepatocellular injury and overall systemic  
19 toxicity. Recent studies indicate that SAGs directly inhibit endothelial cell migration. We show  
20 that SEC inhibits production of serpin E1, crucial in cell migration and vascular repair. This may  
21 be central to SEC's role in SAIE. This study highlights the critical contribution of an alternative  
22 function of SAGs to SAIE and broadens our current understanding of these molecules.

23

## 24 **Introduction**

25 *Staphylococcus aureus* infective endocarditis (SAIE) is an acute and invasive infection of the  
26 cardiac endothelium characterized by the appearance of vegetative lesions (1). *S. aureus* is the  
27 leading cause of infective endocarditis in the developed world (IE) (2-4). The pathognomonic  
28 vegetations are a meshwork of bacterial aggregates and host factors such as fibrin, fibrinogen,  
29 platelets, and red-blood cells that form predominantly on heart valves (5). SAIE results in  
30 significant damage to cardiac structures, in particular the valves and myocardium, due to tissue  
31 toxicity and abscess formation (6). Once established, SAIE can lead to severe complications,  
32 most notably congestive heart failure, stroke, acute kidney injury, and septic shock (4, 6, 7).  
33 Treatment of SAIE is challenging, requiring prolonged antibiotic therapy or surgery to remove  
34 infected valves (4, 6). Even with treatment, SAIE has a high rate of recurrence and a 22-66%  
35 mortality rate (2, 4). Infections are frequently associated with methicillin-resistant *S. aureus*  
36 (MRSA) which complicate treatment and increase mortality (8). Furthermore, life-saving  
37 medical interventions (i.e. valve replacement, cardiac devices, and hemodialysis), an increasing  
38 population with underlying conditions (i.e. diabetes mellitus and immunosuppression), and  
39 advanced age also increase the risk of acquiring *S. aureus* infections (2, 4). As a result, the  
40 incidence of SAIE in the developed world has continued to increase (4). Unfortunately, the great  
41 advances in cardiovascular medicine achieved in the last decade have failed to improve SAIE  
42 outcomes. Thus, the mechanistic understanding of the pathophysiology of SAIE is not only of  
43 fundamental interest, particularly as it relates to bacterial factors critical for vegetation formation  
44 and development of complications, but also of utmost importance for development of effective  
45 intervention strategies.

46           Epidemiological studies demonstrated a strong association between SAIE and a select  
47 group of superantigen (SAg) genes, where 18-25% of SAIE strains encode *entC* (staphylococcal  
48 enterotoxin C; SEC), 9-20% encode *tstH* (toxic shock syndrome toxin; TSST1), and 58-90%  
49 encode the enterotoxin gene cluster (*egc*) (9). Consistent with these studies, SEC, TSST1, and  
50 the *egc* SAGs SEI, SE like (I)-M, SEI-O, and SEI-U all contribute to IE and metastatic infection  
51 in experimental IE (10, 11). However, the underlying mechanism by which SAGs contribute to  
52 SAIE pathogenesis remains speculative. Classically, SAGs are known for their potent T cell  
53 mitogenic activity resulting in dysregulated activation and cytokine production leading to  
54 inflammatory syndromes, and, in extreme cases, toxic shock (12). Superantigenicity results from  
55 toxin cross-linking of the V $\beta$  chain of the T-cell receptor (TCR) to the major histocompatibility  
56 complex class II (MHC-II) receptor on antigen presenting cells (12). Of relevance to SAIE,  
57 endothelial cells also express MHC-II, thus functioning as conditional antigen presenting cells  
58 capable of cross-linking V $\beta$ -TCR resulting in endothelium-mediated superantigenicity (13).

59           The dysregulated immune activation caused by SAGs distracts and diverts the immune  
60 system (14). It also promotes multiple etiologies including atopic dermatitis, pneumonia, extreme  
61 pyrexia, purpura fulminans, and toxic shock syndrome (12). The commonly accepted model of  
62 the role of SAGs in SAIE includes localized or systemic superantigenicity that causes  
63 dysregulation of the immune system preventing clearing of *S. aureus* from the infected heart  
64 endothelium. SAGs also cause capillary leak and hypotension that alters the hemodynamics of the  
65 vascular system (12). This alteration of blood flow may enhance vegetation formation. However,  
66 the requirement of superantigenicity in the pathogenesis and pathophysiology of SAIE has not  
67 been directly tested. In this study, we addressed the hypothesis that superantigenicity promotes  
68 SAIE and disease sequelae.

69 We used the rabbit model of native valve IE with the well-characterized MRSA strain  
70 MW2 (SEC<sup>+</sup>) and MW2 stably expressing SEC toxoids (TCR or MHC-II/TCR inactivated) to  
71 provide evidence for the critical contribution of SEC but not superantigenicity to vegetation  
72 growth, to the magnitude of myocardial inflammation, and to injury to the renal and hepatic  
73 systems. We demonstrate that development of septic vegetations are a pre-requisite for embolic  
74 kidney injury and decreased renal function, while superantigenicity resulting from SAIE  
75 exacerbates embolic hepatocellular damage (even when exhibiting similar liver pathology) and  
76 exacerbates systemic toxicity. With the use of human aortic endothelial cells, we provide  
77 evidence that SEC selectively inhibits the pro-angiogenic factor serpin E1, demonstrating the  
78 ability of SEC to directly modify endothelial cell function in ways that can promote SAIE.

79

## 80 **Results**

### 81 **Superantigenicity is not sufficient to promote vegetation formation**

82 SA<sub>g</sub> activity is the most potent biological function of staphylococcal enterotoxins and causes  
83 lethal pathologies. To establish whether superantigenicity promotes development of SEC-  
84 mediated SAIE, we constructed a *S. aureus* strain expressing SEC with an inactive T-cell  
85 receptor (TCR) binding site (SEC<sub>N23A</sub>). Asn<sup>23</sup> is a highly-conserved, surface exposed residue  
86 located in a cleft between the O/B fold and β-grasp domain of SA<sub>g</sub>s (15). It forms hydrogen  
87 bonds with the backbone atoms of the complementarity-determining region (CDR) 2 of the Vβ-  
88 TCR (16). As such, Asn<sup>23</sup> contact with the Vβ-TCR has one of the greatest energetic  
89 contributions of the complex. Mutations in this position, such as N23A or N23S, greatly  
90 destabilize the Vβ-TCR:SA<sub>g</sub> interaction with profound effects in SA<sub>g</sub> activity (16). SEC<sub>N23A</sub> has  
91 no detectable binding to Vβ-TCR as measured by surface plasmon resonance, no proliferative T-



92 cell responses in thymidine-incorporation assays at concentrations up to 30  $\mu\text{g/ml}$  (16), no  
93 lethality or signs of TSS in rabbits vaccinated subcutaneously with 25  $\mu\text{g}$  three times every two  
94 weeks (17), and no lethality in rabbits after intravenous injection at 3,000  $\mu\text{g/kg}$  (18). Due to its  
95 biological inactivation, SEC<sub>N23A</sub> is excluded as a select agent toxin (18). Importantly, several  
96 vaccination studies have shown no disruption in toxin structure and in the antigenic nature of the  
97 protein (17, 19-21).

98 MW2 (*S. aureus* SEC<sup>+</sup>), the isogenic deletion strain MW2 $\Delta$ sec (*S. aureus* SEC<sup>KO</sup>), and  
99 MW2 $\Delta$ sec complemented to produce SEC with an inactive TCR-binding site (*S. aureus*  
100 SEC<sub>N23A</sub>) were tested in the rabbit model of native valve IE and sepsis (10). Rabbits were  
101 inoculated intravenously with 2-4  $\times 10^7$  total CFU after 2 hours of mechanical damage to the  
102 aortic valve and monitored for a period of 4 days. During that period, rabbits infected with *S.*  
103 *aureus* SEC<sup>KO</sup> had a ~66% decrease in overall vegetation formation where 8/12 rabbits had no  
104 vegetations (Fig. 1A and B) and 4/12 had very small vegetations (sent to pathology) with an  
105 estimated weight of 5 – 15 mg (Fig. S1). In stark contrast, *S. aureus* SEC<sup>+</sup> formed vegetations in  
106 nearly all rabbits (14/15). Of the 14 hearts containing vegetations, 6 were sent to pathology. In  
107 the rest (8/9), vegetation size ranged from 11 – 116 mg with most vegetations weighing >25 mg  
108 (Fig. 1A and B). Surprisingly, complementation with SEC<sub>N23A</sub> restored vegetation formation to  
109 wild type levels (13/17), with vegetation sizes ranging from 12 – 103 mg (Fig. 1A and B).  
110 Vegetations formed by *S. aureus* SEC<sup>+</sup> and *S. aureus* SEC<sub>N23A</sub> also had comparable bacterial  
111 counts of  $1 \times 10^7$  –  $4 \times 10^9$  CFU (Fig. 1C). Of importance, *S. aureus* SEC<sup>+</sup> and *S. aureus* SEC<sub>N23A</sub>  
112 exhibited similar levels of SEC production in liquid culture (Fig. S2) and similar growth rates  
113 and red blood cell hemolysis (Fig. S2). Yet on average, serum IL-6 concentration was reduced in  
114 rabbits infected with *S. aureus* SEC<sub>N23A</sub>, consistent with decreased systemic inflammation (Fig.

115 1D). These results indicate that SEC has SAg-independent activity that is important for the  
116 establishment and progression of vegetative lesions.

117

### 118 **SEC mechanism in SAIE is independent of MHC class II interactions**

119 To confirm the SAg-independent contribution of SEC to SAIE, we constructed a *S. aureus* strain  
120 expressing SEC with dual inactivation of the TCR- and MHC class II-binding sites  
121 (SEC<sub>N23A/F44A/L45A</sub>). MHC-II is also expressed by non-hematopoietic cells such as epithelial cells  
122 and endothelial cells (13). Hence, we also could not exclude the possibility that the *in vivo*  
123 SEC<sub>N23A</sub> interactions with MHC-II accounts for the observed phenotypes. SEC Phe<sup>44</sup> and Leu<sup>45</sup>,  
124 conserved among all enterotoxins, are located on a protruding hydrophobic loop that directly  
125 contacts MHC-II and forms strong electrostatic interactions with the  $\alpha$ -chain (22, 23). Leu<sup>45</sup> is  
126 the most extensively buried amino-acid residue in the SEC:MHC-II interface, but mutations in  
127 either residue (Phe<sup>44</sup> or Leu<sup>45</sup>) effectively inactivate SEC binding (20-24). F44S alone is 1000-  
128 fold less efficient in MHC-II binding resulting in a concomitant reduction of IL-2 in T-cell  
129 proliferation assays (21, 25). Simultaneous introduction of N23A/F44A/L45A in SEC does not  
130 affect protein production, with the complemented strains showing no deficiencies in growth rates  
131 and hemolytic activity (Fig. S2).

132 *S. aureus* SEC<sub>N23A/F44A/L45A</sub> was tested in the rabbit IE model as described above. As  
133 previously observed with *S. aureus* SEC<sub>N23A</sub>, *S. aureus* SEC<sub>N23A/F44A/L45A</sub> produced vegetations at  
134 wildtype levels (12/17), with vegetations that ranged in size from 3 – 107 mg, most weighed >25  
135 mg (Fig. 1A and B) and contained  $5 \times 10^7$  –  $2 \times 10^9$  CFU (Fig. 1C). Four of the 12 hearts containing  
136 vegetations were sent to pathology. The *S. aureus* SEC<sub>N23A/F44A/L45A</sub> strain on average also  
137 resulted in reduced serum IL-6 concentrations when compared to rabbits infected with *S. aureus*

138 SEC<sup>+</sup> (Fig. 1D). Overall, infection with *S. aureus* strains producing toxoids formed vegetations  
139 in 77% of the rabbits (26/34), compared to 93% (14/15) in rabbits infected with *S. aureus* SEC<sup>+</sup>.  
140 These results highlight the critical requirement of SEC in SAIE independent of superantigenicity  
141 and MHC class II interactions.

142

### 143 **Superantigenicity does not drive myocardial inflammation in SAIE**

144 SAIE presents as a rapidly-growing and progressive vegetative lesion that results in the quick  
145 destruction of valvular leaflets and extension of the infectious process into the myocardium and  
146 adjacent structures (5). So far, the data supports a critical contribution of SEC but not  
147 superantigenicity to vegetation growth on heart valves. We then asked whether SEC  
148 superantigenicity promotes extension of the vegetative lesion into the surrounding tissue  
149 changing the overall cardiac pathology. To address this, we performed histopathological analyses  
150 on transverse sections of hearts containing vegetations. Rabbits infected with *S. aureus* SEC<sup>KO</sup>  
151 with no vegetations did not exhibit pathology at the end of experimentation (Fig. S1). Hence, we  
152 processed all hearts of *S. aureus* SEC<sup>KO</sup> infected rabbits with visible vegetations (mean size  $2.7 \pm$   
153  $1 \text{ mm}^2$ , n=4). Hearts from rabbits infected with *S. aureus* SEC<sup>+</sup>, *S. aureus* SEC<sub>N23A</sub>, or *S. aureus*  
154 SEC<sub>N23A/F44A/L45A</sub> were selected randomly on the basis of presence of vegetations (mean size  $6.6$   
155  $\pm 2 \text{ mm}^2$ , n=15).

156 Consistent with histopathology of SAIE described in humans, *S. aureus* vegetations in  
157 rabbits were composed of large aggregates of bacterial colonies interspersed in a fibrinous  
158 meshwork of host factors and cell debris (Fig. S3-S5). However, the vegetative lesions were  
159 heterogeneous across infection groups in presentation (location and size of bacterial clusters) and  
160 in the magnitude of suppurative intracardial complications (myocardial inflammation and septic

161 coronary arterial emboli). In rabbits infected with *S. aureus* SEC<sup>+</sup> (n=6), most vegetations were  
162 located on aortic valve cusps and valve leaflets, with large clusters of bacteria present on the  
163 leaflets and intermixed within the central core of the vegetation adjacent to the aorta. A few  
164 vegetations formed on the aortic wall were transmural (across the entire wall) and extended into  
165 the adjacent adipose tissue. Rabbits infected with *S. aureus*-producing SEC toxoids (SEC<sub>N23A</sub> or  
166 SEC<sub>N23A/F44A/L45A</sub>) exhibited very similar histologic presentation to each other and to those  
167 infected with *S. aureus* SEC<sup>+</sup>, with a few exceptions. The endothelium adjacent to the vegetation  
168 of *S. aureus* producing SEC toxoids was rarely hypertrophied (plump) and the vegetation was  
169 not observed to form on valve leaflets. Strikingly, all of the small *S. aureus* SEC<sup>KO</sup> vegetations  
170 formed on the aortic wall and extended into the adjacent adipose tissue (Fig. S1).

171 To directly address the contribution of SEC superantigenicity to myocardial  
172 inflammation, the magnitude of the inflammatory cell infiltrate was graded on a scale of 0-3  
173 histologically (Fig. 2A). Most vegetative lesions presented with inflammation that was almost  
174 exclusively heterophilic (neutrophilic) adjacent to the vegetations (Fig. 2A). Foci of heterophils  
175 infiltrating the myocardium, cellular debris, and necrosis were also observed (Fig. 2A, insets). In  
176 the most severe cases (Grade 3), large and coalescing bands of heterophilic infiltrate surrounded  
177 the aortic ring (Fig. 2A). Vegetative lesions from *S. aureus* SEC<sup>+</sup> consistently showed high grade  
178 myocardial inflammation that were indistinguishable histologically from those formed by *S.*  
179 *aureus* producing SEC toxoids (SEC<sub>N23A</sub> or SEC<sub>N23A/F44A/L45A</sub>) (Fig. 2B). Surprisingly, the *S.*  
180 *aureus* SEC<sup>KO</sup> vegetations that formed on the aortic wall, albeit small, caused high grade  
181 inflammation adjacent to the vegetation. This is in stark contrast to the histopathology from  
182 rabbits infected with *S. aureus* SEC<sup>KO</sup> with no vegetations, which was unremarkable (Fig. S1).  
183 Of interest, septic coronary arterial emboli (coronary arteries containing fibrin or bacterial

184 thrombi) with adjacent myocardial necrosis were observed in rabbits infected with *S. aureus*  
185 SEC<sup>+</sup> and SEC<sub>N23A</sub> (Fig. 2C and E). Vegetations that penetrated deeper into the pericardium  
186 causing epicardial lesions and saponification (necrosis) of epicardial fat were present in 5/15  
187 rabbits infected with *S. aureus* SEC<sup>+</sup> or *S. aureus* producing SEC toxoids (Fig. 2D and E).  
188 Coronary emboli and epicardial lesions were observed in only 1/4 rabbits infected with *S. aureus*  
189 SEC<sup>KO</sup> (Fig. 2E). These observations indicate that intracardial complications, such as myocardial  
190 inflammation, arise as a result of the presence of a vegetation and are independent of SEC  
191 superantigenicity.

192

### 193 **SEC inhibits the pro-angiogenic factor serpin E1 in endothelial cells**

194 In acute IE, vegetative lesions develop rapidly with no evidence of repair (26). The fact that SEC  
195 promotes SAIE independently of superantigenicity suggests that it can directly target the  
196 endothelium and modify its function. Re-endothelialization, driven by pro-angiogenic factors, is  
197 essential for vascular endothelial repair (27). We hypothesized that SEC may dysregulate  
198 angiogenesis as a mechanism to promote disease. To test this, immortalized human aortic  
199 endothelial cells (iHAEC) were treated with 20 µg/ml of purified SEC and a protein array  
200 utilized to measure changes in secreted angiogenesis-related proteins. Twenty-four soluble  
201 factors produced by iHAEC were consistently detected in supernates (6 anti-angiogenic, 15 pro-  
202 angiogenic, and 3 cytokines). A Log<sub>2</sub> fold change of ± 1 was set as a threshold for relevant  
203 changes (Fig. 3). None of the anti-angiogenic factors exhibited relevant changes from baseline.  
204 Of the pro-angiogenic factors, serpin E1 [PAI-1 (plasminogen activator inhibitor-1)] exhibited on  
205 average an 81% decrease (Log<sub>2</sub> = -2.38) from baseline. The cytokines IL-1β, IL-8, and MCP-1  
206 (monocyte chemoattractant protein-1) were not detected in amounts above threshold (Fig. 3).

207 The selective inhibition of the pro-angiogenic factor serpin E1 is consistent with the hypothesis  
208 that SEC inhibits angiogenesis in endothelial cells.

209

### 210 **SEC contribution to vegetation formation is sufficient to promote high lethality**

211 Cardiotoxicity and septic shock are complications associated with SAIE that frequently lead to  
212 higher mortality rates in humans (4, 5, 28). We had hypothesized that one of the mechanisms  
213 leading to high lethality in *S. aureus* SEC<sup>+</sup> IE is vascular toxicity and multi-organ dysfunction  
214 resulting from superantigenicity (10). Yet, infection with either *S. aureus* SEC<sub>N23A</sub> or *S. aureus*  
215 SEC<sub>N23A/F44A/L45A</sub> still led to high lethality, with ~50% of rabbits succumbing to infection during  
216 the experimental period (8/17 for SEC<sub>N23A</sub> and 10/17 for SEC<sub>N23A/F44A/L45A</sub>) compared to 73% of  
217 rabbits infected with *S. aureus* SEC<sup>+</sup> (Fig. 4A). Rabbits infected with SEC-producing strains  
218 (wildtype or toxoid) consistently exhibited higher bacteremia (>1x10<sup>3</sup> CFU/ml) than those  
219 infected with *S. aureus* SEC<sup>KO</sup> (Fig. 4B), which correlates with the presence of large septic  
220 vegetations. All strains tested presented with similar degrees of splenomegaly due to infection  
221 compared to uninfected controls (Fig. 4C). Thus, superantigenicity alone does not fully account  
222 for the high lethal outcomes associated with SEC production. Instead, SEC contribution to  
223 vegetation formation plays a prominent role in SAIE lethality.

224       Vegetation fragmentation and metastatic infection occur in one third of SAIE episodes  
225 and are associated with hemodynamic and embolic complications in multiple organ systems,  
226 including the vascular, nervous, pulmonary, gastrointestinal, renal, and hepatic systems (4).  
227 Septic embolization of cardiac vegetations increases mortality in patients with IE (29). In our  
228 previous studies, we noticed that rabbits consistently developed lesions in the liver and kidneys  
229 when infected with *S. aureus* wild type strains in the IE model (30). Hence, to further tease out

230 the contribution, if any, of superantigenicity to systemic complications associated with SAIE, we  
231 focused on the effect of SEC production to kidney and liver injury and function.

232

### 233 **SEC causes renal impairment independent of superantigen-mediated toxicity**

234 We had previously observed renal ischemia, infarction, and abscess formation associated with  
235 SEC production during SAIE in rabbits (10). It remained to be established if superantigenicity-  
236 mediated toxicity significantly contributed to acute kidney injury. To address this, all  
237 experimental rabbits were grossly assessed for kidney lesion pathology (n=61) on a scale from 0-  
238 3. The lesions presented as hemorrhagic, necrotic, or ischemic. In the most severe pathology  
239 (Grade 3), lesions were locally extensive, coalescing to diffuse, and extended across a large  
240 surface of the kidney (Fig. 5A, Table S3). Kidneys from *S. aureus* SEC<sup>+</sup> infected rabbits  
241 presented with severe pathology (Grade 2-3) in 66% of the animals (Fig. 5B). Similar kidney  
242 pathology developed in 50% of rabbits infected with *S. aureus* producing SEC toxoids (8/17 for  
243 SEC<sub>N23A</sub> and 9/17 for SEC<sub>N23A/F44A/L45</sub>) (Fig. 5B). Overall, rabbits infected with SEC-producing  
244 strains (wildtype or toxoid) were more likely to develop severe kidney pathology compared to *S.*  
245 *aureus* SEC<sup>KO</sup> infected rabbits (OR: 13.50, 95% CI: 1.931-150.2,  $p = 0.0037$ ) (Fig. S6).

246 Consistent with kidney pathology, serum levels of blood urea nitrogen (BUN) and  
247 creatinine (biological markers of renal function) were significantly increased in rabbits infected  
248 with SEC-producing strains (Fig. 5C). BUN levels rose three-fold over pre-infection baseline in  
249 89% of these rabbits (40/45) and creatinine rose two-fold in 44% (24/45). In stark contrast, few  
250 rabbits infected with *S. aureus* SEC<sup>KO</sup> had dramatic fold changes over baseline, where only 17%  
251 (2/12) and 25% (3/12) exhibited similar increases in BUN and creatinine, respectively (Fig. 5C).  
252 These results provide evidence that acute kidney injury in experimental SAIE is likely due to

253 embolic disease (vegetation fragmentation and lodging in the kidneys) leading to decreased renal  
254 function rather than kidney failure that is observed in toxic shock syndrome (12).

255

### 256 **Superantigenicity promotes hepatocellular injury and systemic toxicity**

257 SAIE can lead to acute liver injury through persistent systemic inflammation and hypoperfusion  
258 (31-33), effects that can be secondary to superantigenicity. In our studies, liver pathology  
259 presented as pale, streak-shaped lesions that were focal, multifocal, or coalescing (Fig. 6A).  
260 Lesions were grossly scored on a scale from 0-3 (Table S3). In the most severe pathology (Grade  
261 3), lesions presented as multifocal to coalescing, and extensive to diffuse throughout the surface.  
262 Livers from *S. aureus* SEC<sup>+</sup> infected rabbits presented with severe pathology (Grade 2-3) in 80%  
263 of the animals (12/15; Fig. 6B). Similar liver pathology developed in ~70% of rabbits infected  
264 with *S. aureus* producing SEC toxoids (9/17 for SEC<sub>N23A</sub> and 13/16 for SEC<sub>N23A/F44A/L45</sub>) (Fig.  
265 5B). Overall, rabbits infected with SEC-producing strains (wildtype or toxoid) were more likely  
266 to develop severe liver pathology compared to *S. aureus* SEC<sup>KO</sup> infected rabbits (OR: 7.286,  
267 95% CI: 1.806-26.91,  $p = 0.0064$ ) (Fig. S6). Of note, in rabbits infected with *S. aureus* SEC<sup>KO</sup>,  
268 severe liver pathology was largely observed only in rabbits that developed small aortic  
269 vegetations (3/4 rabbits). These results indicate that SEC production and vegetation formation  
270 are critical mediators of liver pathology, likely via the release of septic emboli based on gross  
271 lesions.

272 To evaluate if superantigenicity, whether directly or indirectly, has an effect on liver  
273 function, we measured serum levels of aspartate aminotransferase (AST) and alanine

274 aminotransferase (ALT; Fig. 6C). AST and ALT are biomarkers of hepatocellular damage.

275 Interestingly, rabbits infected with *S. aureus* SEC<sup>+</sup> had significantly higher mean levels of AST



276 (236 U/L) and ALT (103 U/L) compared to those infected with *S. aureus* producing SEC toxoids  
277 or *S. aureus* SEC<sup>KO</sup> (AST  $\leq$  73 U/L; ALT  $\leq$  76 U/L). Correspondingly, the ratio of AST to ALT  
278 was significantly higher in rabbits infected with *S. aureus* SEC<sup>+</sup> (Fig. 6C). These rises in liver  
279 aminotransferase enzymes are consistent with what is observed in humans during acute liver  
280 injury and ischemic hepatitis (32-33). Of note, lactate dehydrogenase (LDH) was the only other  
281 enzyme, of those tested, differentially increased in rabbits infected with *S. aureus* SEC<sup>+</sup> (Fig.  
282 6C). LDH is found in almost every cell in the body, as such, is a non-specific biomarker of tissue  
283 damage. Therefore, superantigenicity increases overall tissue toxicity and hepatocellular injury,  
284 as reflected by increased levels of AST, ALT, and LDH.

285

## 286 **Discussion**

287 *S. aureus* SAGs are ubiquitous among human clinical isolates and implicated in both colonization  
288 and pathogenic mechanisms (34). Although their significance as virulence factors has been  
289 established, how SAGs specifically contribute to *S. aureus* pathogenesis has become a pressing  
290 question with the discovery of the multifunctionality of these toxins (35-37). Still, in SAG-  
291 mediated illnesses, superantigenicity is placed as a triggering event mediating or exacerbating  
292 pathological responses during *S. aureus* infection. Current evidence indicates that the SAGs SEC,  
293 TSST1 and select *egc* toxins play a novel and essential role in the etiology of SAIE by yet  
294 uncharacterized mechanisms (10, 11). It has been proposed that superantigenicity leading to  
295 hypotension and immune dysregulation allows bacterial immune evasion and persistence, while  
296 direct interaction with the heart endothelium promotes endothelium dysfunction and disease  
297 progression (10, 11, 35). With the use of *S. aureus* producing SEC inactivated in MHC-II and/or  
298 TCR binding, we provide evidence that superantigenicity is not the primary mechanism by which

299 SEC promotes vegetation formation, cardiac toxicity, and extracardiac complications such as  
300 such acute kidney injury. Our results are consistent with published studies noting that not all  
301 SAGs, such as the *egc* SAGs SEG and SEI-N, promote SAIE (11). SEG and SEI-N have  
302 comparable T cell mitogenic activity as SEA, SEB, and TSST1 (38, 39), indicating that  
303 superantigenic defects are not likely to account for their deficiency in promoting SAIE. It further  
304 highlights the critical contribution of SAGs, like SEC, in life-threatening pathologies by novel  
305 mechanisms that remain largely speculative or poorly understood at best.

306         The fact that SAGs promote SAIE development irrespective of their superantigenic  
307 activity indicates that their ability to target the endothelium and modify its function, as  
308 demonstrated for TSST1, may be an important mechanism contributing to disease development  
309 (35). TSST1 directly causes dysregulated activation of iHAECs and disrupts vascular integrity  
310 and re-endothelialization (35). Re-endothelialization is essential for vascular repair and wound  
311 healing and is dependent on angiogenic signals (40). Here we show that SEC selectively inhibits  
312 the pro-angiogenic factor serpin E1. Serpin E1, also known as plasminogen activator inhibitor  
313 type-1 (PAI-1), is particularly induced as part of the wound-repair program where it promotes  
314 endothelial cell migration towards fibronectin (41). The specific inhibition of serpin E1 in human  
315 umbilical vein endothelial cells (HUVECs) disrupts angiogenesis in *in vitro* cell migration and  
316 capillary network formation assays (42). Thus, SEC could promote IE if the injured endothelium  
317 is delayed from healing, exposing the sub-endothelial tissues and promoting deposition of fibrin,  
318 other pro-coagulants and *S. aureus*, ultimately contributing to initiation or spread of the  
319 vegetative lesion (10, 34).

320         Once established, SAIE is locally destructive, extending beyond the valve leaflets or  
321 valve cusps into perivalvular tissue, including the aortic wall, causing progressive myocardial

322 inflammation and abscess formation (5). Of great importance, the cardiac histopathology  
323 presentation of SAIE in rabbits is strikingly similar to that observed in humans. Myocardial  
324 inflammation is almost exclusively heterophilic causing aortic ring abscesses and necrosis in the  
325 most severe cases. Yet, myocardial inflammation resulting from *S. aureus* expressing SEC  
326 toxoids was not distinct from that caused by the wildtype strain. Therefore, while SEC is  
327 required for development of large septic vegetations, the data does not support a significant  
328 contribution of superantigenicity to the intracardiac heterophilic response that ensues following  
329 vegetation formation. It is unlikely that SEC solely drives this response as the atypical formation  
330 of small vegetations on the aortic wall in rabbits infected with *S. aureus* SEC<sup>KO</sup> also leads to  
331 similar responses adjacent to the vegetation. *S. aureus* produces a multitude of secreted toxins  
332 and enzymes during invasive disease including the large family of cytolysins, proteases, and  
333 other SAGs that likely contribute to inflammation. Future studies will need to address the impact  
334 of any of these factors in SAIE cardiotoxicity.

335         SAIE has a high mortality rate owing to the high incidence of both intracardiac  
336 complications arising from the rapid local spread of the infection and the high incidence of  
337 embolization of septic vegetation fragments (2, 4, 43). Lodging of septic emboli within terminal  
338 blood vessels causes localized ischemia and infarction in multiple organ systems. In humans and  
339 in experimental rabbits, these complications can be manifested as myocardial infarction, kidney  
340 and/or liver injury, and strokes (43). Of these, kidney injury leading to acute renal insufficiency  
341 with progression to acute renal failure is tightly associated with SAIE severity, development of  
342 septic shock, and IE lethality (7). The role of SEC in kidney injury during SAIE has been  
343 demonstrated and it was proposed that SEC's role in inflammation, toxicity, or immune  
344 dysregulation was also required (10). Our studies rule out superantigenicity-mediated immune

345 dysregulation as the primary mechanism causing kidney injury. Rabbits infected with *S. aureus*  
346 producing SEC toxoids develop severe kidney pathology coupled with significant decreases in  
347 renal function. Furthermore, the type of lesions observed upon gross examination (hemorrhagic,  
348 necrotic, or ischemic) are consistent with embolization of cardiac vegetations. Hence, the  
349 contribution of SEC to kidney injury may be a consequence of its role in vegetation formation.  
350 However, we have not ruled out a mechanism of renal deterioration arising as a direct effect of  
351 SEC on the kidneys or its vasculature.

352         While the correlation between kidney function and poor prognosis in IE is well  
353 established, literature on the effects of SAIE on liver injury is scarce (4). The liver has central  
354 roles in clearing circulating bacteria and their toxins and is key in initiating or amplifying  
355 inflammatory responses during systemic infections (7). Development of liver emboli has been  
356 noted in patients with IE that develop septic shock, yet, not much more has been reported. In line  
357 with published reports, we found that multifocal ischemic liver lesions were present grossly in  
358 the great majority of rabbits infected with *S. aureus* SEC<sup>+</sup>. As seen with the kidney, liver  
359 pathology has a similar presentation in rabbits infected with strains producing wildtype SEC or  
360 toxoids. Again, these results demonstrate a dependency on SEC for tissue injury that is  
361 independent of superantigenicity. Hepatocellular injury as a result of extrahepatic bacterial  
362 infection has been reported to be largely dependent on bacterial toxins (7). Indeed, AST and  
363 ALT are increased >15 fold and >3 fold, respectively, in up to 40% of rabbits infected with *S.*  
364 *aureus* SEC<sup>+</sup>. In contrast to the kidneys, in the liver, superantigenicity significantly contributes to  
365 hepatocellular injury. Increases in serum aminotransferases correlates with increases in IL-6 and  
366 LDH in rabbits infected with *S. aureus* SEC<sup>+</sup> versus those infected with *S. aureus* expressing

367 SEC toxoids. Altogether, the data provides evidence for superantigenicity increasing  
368 hepatocellular injury during SAIE either directly or indirectly by increasing embolic events.

369         It is critical to recognize that while adaptive immune system activation is characteristic of  
370 staphylococcal SAGs, this is not their only biological function. Recently, the SAG *SEI-X* was  
371 found to inhibit neutrophil function via a sialic acid-binding motif uniquely present in this SAG  
372 (37). The SAGs TSST1, SEB, and SEC directly affect the function of endothelial/epithelial cells  
373 and adipocytes independent of superantigenicity (35, 44, 45). It was reported for TSST1 that  
374 activation of epithelial cells was caused by a dodecapeptide close to the base of the central  $\alpha$ -  
375 helix of the molecule (36). The dodecapeptide sequence is found in all staphylococcal SAGs, yet  
376 its effects on non-hematopoietic cells is poorly characterized (12, 36, 45). The relevance of the  
377 SEC dodecapeptide in endothelial cell function and *S. aureus* diseases such as IE is currently  
378 being addressed.

379         In conclusion, we provide evidence that SEC is a multifunctional toxin critical to the  
380 pathogenesis and pathophysiology of SAIE. The superantigenicity independent effects of SEC  
381 are essential for the establishment of proliferative vegetations and systemic complications  
382 associated with disease progression. Overall, superantigenicity seems to exacerbate systemic  
383 inflammation and toxicity, with a significant contribution to hepatocellular injury. It now  
384 becomes possible to tease apart the localized SAG-host interactions triggering or exacerbating  
385 vegetation growth. It is also clear that SAGs do much more than previously anticipated or  
386 expected based on the current understanding of these molecules. Given the prevalence of SAGs  
387 among both methicillin-susceptible and resistant *S. aureus* strains, it becomes fundamental to  
388 understand the involvement of superantigenic-independent mechanisms in other invasive and  
389 life-threatening diseases.

390

## 391 **Materials and methods**

392 **Bacterial strains and growth conditions.** Staphylococcal strains were used from low-  
393 passage-number stocks. All staphylococcal strains were grown in Bacto™ Todd Hewitt (TH)  
394 (Becton Dickinson) broth at 37°C with aeration (225 rpm) unless otherwise noted. Strains and  
395 plasmids used in this study are listed in Table S1. Plasmids used for complementation were  
396 maintained using carbenicillin (100 µg/ml) in *E. coli* DH5α. For endocarditis experiments,  
397 strains were grown overnight, diluted, and washed in phosphate buffered saline (PBS - 2mM  
398 NaH<sub>2</sub>PO<sub>4</sub>, 5.7 mM Na<sub>2</sub>HPO<sub>4</sub>, 0.1 M NaCl, pH 7.4).

399 **Construction of chromosomally complemented toxoid strains.** SEC is a CDC  
400 designated select agent. As such, we are not allowed to use the wildtype copy of the gene in  
401 recombinant studies. For this reason, all PCR products generated in the making of the toxoid  
402 complement strains either included the permissible N23A SEC TCR mutation or was only a  
403 partial amplification of *sec* missing either the TCR or MHC-II domain. Each step of plasmid  
404 construction was verified by Sanger sequencing to contain the N23A TCR mutation. PCR  
405 amplification was performed using Phusion polymerase (New England Biolabs; NEB) unless  
406 otherwise noted. *S. aureus* expressing SEC<sub>N23A</sub> or SEC<sub>N23A/F44A/L45A</sub> were made by markerless  
407 chromosomal complementation in MW2Δ*sec* (Table. S1) with the genes expressed under the  
408 control of the native promoter and terminator (46). The SEC<sub>N23A</sub> gene sequence was created by  
409 amplifying two fragments from MW2 with primer sets pJB38xN23A<sub>promF</sub>/promN23R and  
410 termN23F/pJB38xN23A<sub>termR</sub>. The chromosomal complementation plasmid, pJB38-NWMN29-  
411 30, was digested with EcoRV and PCR products inserted by Gibson Assembly (NEB) as  
412 previously described, creating pKK29 (47). SEC<sub>N23</sub> was amplified from pKK29 with the primer

413 set pUC19SECN23AptF/pUC19SECN23ApR and inserted into linearized pUC19, KpnI and  
414 EcoRI, by Gibson Assembly to create pKK33. The MHC-II binding site mutations were  
415 introduced into pKK33 by site-directed mutagenesis (QuickChange II, Agilent Technologies)  
416 using the primer set SECF44A/L45Afor/SECF44A/L45Arev, creating pKK39. The  
417 SEC<sub>N23A/F44A/L45A</sub> gene sequence was amplified from pKK39 with primer set  
418 pJB38xN23ApromF/ pJB38xN23AtermR and inserted into pJB38-NWMN29-30 as described  
419 above, creating pKK42. pKK29 and pKK42 were electroporated into *S. aureus* RN4220 and  
420 moved into MW2Δsec by generalized transduction with ϕ11(48). *S. aureus* strains containing  
421 plasmid were selected for with chloramphenicol (20 µg/ml) at 30°C. Allelic exchange was  
422 performed as previously described (46), chromosomal insertions detected by PCR with primer  
423 set XNWMN2930F/XNWMN2930R, and verified by Sanger sequencing. Primers were  
424 purchased from Integrated DNA Technologies (Table S2).

425 **Rabbit model of IE.** The rabbit model of IE was performed as previously described with  
426 some modifications (10). 2-3 kg New Zealand White Rabbits were obtained from Bakkom  
427 Rabbitry (Red Wing, MN) and anesthetized with ketamine (dose range: 10-50 mg/kg) and  
428 xylazine (dose range: 2.5-10 mg/kg). Mechanical damage to the aortic valve was done by  
429 introducing a hard, plastic catheter via the left carotid artery, left to pulse against the valve for  
430 2h, removed, and the incision closed. Rabbits were inoculated via the marginal ear vein with  
431 2x10<sup>7</sup>-4x10<sup>7</sup> total CFU in PBS and monitored 4 times daily for a period of 4 days. For pain  
432 management, rabbits received buprenorphine (dose range: 0.01 – 0.05 mg/kg) twice daily. At the  
433 conclusion of each experiment, bacterial counts were obtained from heparinized blood (50 USP  
434 units/mL). Rabbits were euthanized with Euthasol (Virbac) and necropsies performed to assess  
435 overall health. Spleens were weighed and used as an infection control, kidney and liver gross

436 pathology was graded using gross lesion pathology scale (Table S3), aortic valves were exposed  
437 to assess vegetation growth, and vegetations that formed were excised, weighed, and suspended  
438 in PBS for CFU counts. A minimum of 4 rabbit hearts from each infection group were placed in  
439 10% neutral buffered formalin and further processed by the Comparative Pathology Laboratory  
440 at the University of Iowa for histopathological analyses. Vegetation weight and bacterial counts  
441 cannot be obtained from hearts prepared for histology. All experiments were performed  
442 according to established guidelines and the protocol approved by the University of Iowa  
443 Institutional Animal Care and Use Committee (Protocol 6121907). All rabbit experimental data  
444 is a result of at least 3 independent experiments per infection group.

445 **Histopathologic scoring.** Fixed tissues were routinely processed, cut at 5  $\mu\text{m}$ , and  
446 hematoxylin and eosin (HE) stained or Gram stained. Slides were reviewed and scored by a  
447 board-certified veterinary pathologist.

448 **Serum analysis.** Rabbit serum was obtained from heparinized blood (50 USP units/mL)  
449 collected before infection and at 48, 72, and 96 hpi. Blood was centrifuged at room temperature  
450 at 5000 x g for 10 min. The collected supernatant was centrifuged for an additional 5 min, filter  
451 sterilized using a 0.2  $\mu\text{m}$  filter, and stored at -80°C for further analysis. Serum samples were sent  
452 to the University of Iowa Diagnostic Laboratories and evaluated for the following serum  
453 analytes: aspartate aminotransferase (AST; U/L), alanine aminotransferase (ALT; U/L), blood  
454 urea nitrogen (BUN; mg/dl), creatinine (mg/dl), and lactate dehydrogenase (LDH; mg/dl).

455 **Rabbit IL-6 ELISA.** IL-6 was quantified from serum samples using the R&D Systems  
456 DuoSet Rabbit IL-6 ELISA kit, according to manufacturer's instructions. Serum samples were  
457 diluted 1:10 in reagent diluent prior to use. The optical density (O.D.) was determined using a  
458 TECAN M200 plate reader (Tecan Group Ltd.) set to 450 nm with wavelength correction set to



459 540 nm. A standard curve was created by linear regression analysis of the IL-6 concentration  
460 versus OD, log-transformed (GraphPad Prism 8).

461 **SEC purification.** SEC was purified from *S. aureus* strain FRI913 in its native form by  
462 ethanol precipitation and thin-layer isoelectric focusing as previously described (49). Preparation  
463 of SEC resulted in a single band by Coomassie blue stain. Toxin preparations were tested for  
464 lipopolysaccharide (LPS) contamination with the ToxinSensor Chromogenic LAL Endotoxin  
465 Assay following manufacturer's instructions (GenScript). SEC preparations had < 0.1ng of LPS  
466 per 100 µg of toxin (< 0.02 ng of LPS per 20 µg of SEC).

467 **Human aortic endothelial cell culture.** Immortalized human aortic endothelial cells  
468 (iHAECs) were cultured as previously described in Medium 200 with low-serum growth  
469 supplement (both from Gibco Life Technologies) in 5% CO<sub>2</sub> at 37°C (35). All experiments were  
470 conducted using iHAECs at 4-10 passages from a single clone.

471 **Proteome Profiler™ Human Angiogenesis Antibody array.** 96-well tissue culture  
472 plates coated with 1% gelatin were seeded with 7,000 iHAECs/well and grown to confluence.  
473 Fresh media containing purified SEC (20 µg/ml) was added and plates were incubated overnight  
474 at 37°C with 5% CO<sub>2</sub>. The supernatant was removed and stored at -80°C for further analysis.  
475 The relative expression of 55 angiogenesis-related proteins was determined from the supernatant  
476 using a Proteome Profiler™ Human Angiogenesis Antibody Array according to the  
477 manufacturer's instructions (R&D Systems). 120 µL of supernates along with IRDye 800CW  
478 Streptavidin (LI-COR, 1:2000 dilution) as a secondary antibody were used for this assay. The  
479 fluorescent signal was detected using the LI-COR Odyssey CLx (84 µm resolution, auto  
480 intensity 800 nm channel). Mean pixel density was calculated from duplicate spots on the  
481 membrane and averaged using Image Studio Software (LI-COR). The log<sub>2</sub> fold-changes over

482 media-only control were calculated for each detected protein. All treatments were matched to  
483 media only control. Data is a result of four biological replicas performed in duplicate.

484 **Statistical analyses.** The log-rank, Mantel Cox test was used for statistical significance  
485 of survival curves. Normality was assessed using the D'Agostino & Pearson test along with  
486 associated Q-Q plots for data distribution. For comparison across means log-transformed data  
487 was used and statistical significance was determined by using one-way analysis of variance  
488 (ANOVA) with the Holm-Sidak multiple comparison test for the following data sets: vegetation  
489 size, vegetation CFU, blood CFU, spleen size, BUN, creatinine, AST, ALT, LDH, and IL-6.  
490 Statistical significance for gross pathology data was determined using Fisher's exact test along  
491 with calculated odds ratios and 95% confidence intervals. Statistical significance of virulence  
492 factor production was determined by using the nonparametric Kruskal-Wallis test.  $p \leq 0.05$  was  
493 considered statistically significant (GraphPad Prism 8).

494

## 495 **References**

- 496 1. V. G. Fowler, D. T. Durack, Infective endocarditis, *Curr. Opin. Cardiol.* **9**, 389-400 (1994).
- 497 2. V. G. Fowler, J. M. Miro, B. Hoen, C. H. Cabell, E. Abrutyn, E. Rubinstein, G. R. Corey, D. Spelman, S. F.  
498 Bradley, B. Barsic, P. A. Pappas, K. J. Anstrom, D. Wray, C. Q. Fortes, I. Anguera, E. Athan, P. Jones, J. T. M. Van  
499 Der Meer, T. S. J. Elliott, D. P. Levine, A. S. Bayer, Staphylococcus aureus endocarditis: A consequence of medical  
500 progress, *J. Am. Med. Assoc.* **293**, 3012–3021 (2005).
- 501 3. D. H. Bor, S. Woolhandler, R. Nardin, J. Bruschi, D. U. Himmelstein, Infective Endocarditis in the U.S., 1998-  
502 2009: A Nationwide Study, *PLoS One.* **8**, e60033–e60033 (2013).
- 503 4. S. Y. C. Tong, J. S. Davis, E. Eichenberger, T. L. Holland, V. G. Fowler, Staphylococcus aureus infections:  
504 Epidemiology, pathophysiology, clinical manifestations, and management, *Clin. Microbiol. Rev.* **28**, 603–661  
505 (2015).

- 506 5. G. Thiene, C. Basso, Pathology and pathogenesis of infective endocarditis in native heart valves, *Cardiovasc.*  
507 *Pathol.* **15**, 256–263 (2006).
- 508 6. M. L. F. Guerrero, J. J. G. López, A. Goyenechea, J. Fraile, M. De Górgolas, Endocarditis caused by  
509 staphylococcus aureus a reappraisal of the epidemiologic, clinical, and pathologic manifestations with analysis of  
510 factors determining outcome, *Medicine (Baltimore)*. **88**, 1–22 (2009).
- 511 7. C. Olmos, I. Vilacosta, C. Fernández, J. López, C. Sarriá, C. Ferrera, A. Revilla, J. Silva, D. Vivas, I. González, J.  
512 San Román, Contemporary epidemiology and prognosis of septic shock in infective endocarditis, *Eur. Heart J.* **34**,  
513 1999–2006 (2013).
- 514 8. E. Klein, D. L. Smith, R. Laxminarayan, Hospitalizations and deaths caused by methicillin-resistant  
515 Staphylococcus aureus, United States, 1999-2005, *Emerg. Infect. Dis.* **13**, 1840–1846 (2007).
- 516 9. J. J. C. Nienaber, B. K. Sharma Kuinkel, M. Clarke-Pearson, S. Lamlerthton, L. Park, T. H. Rude, S. Barriere, C.  
517 W. Woods, V. H. Chu, M. Marín, S. Bukovski, P. Garcia, G. R. Corey, T. Korman, T. Doco-Lecompte, D. R.  
518 Murdoch, L. B. Reller, V. G. Fowler, Methicillin-susceptible staphylococcus aureus endocarditis isolates Are  
519 associated with clonal complex 30 genotype and a distinct repertoire of enterotoxins and adhesins, *J. Infect. Dis.*  
520 **204**, 704–713 (2011).
- 521 10. W. Salgado-Pabón, L. Breshears, A. R. Spaulding, J. A. Merriman, C. S. Stach, A. R. Horswill, M. L. Peterson,  
522 P. M. Schlievert, E. J. Johnson, Ed. Superantigens are critical for Staphylococcus aureus infective endocarditis,  
523 sepsis, and acute kidney injury, *MBio.* **4**, e00494-13 (2013).
- 524 11. C. S. Stach, B. G. Vu, J. A. Merriman, A. Herrera, M. P. Cahill, P. M. Schlievert, W. Salgado-Pabón, Novel  
525 Tissue Level Effects of the Staphylococcus aureus Enterotoxin Gene Cluster Are Essential for Infective  
526 Endocarditis, *PLoS One.* **11**, e0154762–e0154762 (2016).
- 527 12. A. R. Spaulding, W. Salgado-Pabón, P. L. Kohler, A. R. Horswill, D. Y. M. Leung, P. M. Schlievert,  
528 Staphylococcal and streptococcal superantigen exotoxins, *Clin. Microbiol. Rev.* **26**, 422–447 (2013).
- 529 13. P. A. Brogan, V. Shah, N. Klein, M. J. Dillon, V $\beta$ -restricted T cell adherence to endothelial cells: A mechanism  
530 for superantigen-dependent vascular injury, *Arthritis Rheum.* **50**, 589–597 (2004).
- 531 14. S. W. Tuffs, S. M. M. Haeryfar, J. K. McCormick, Manipulation of Innate and Adaptive Immunity by  
532 Staphylococcal Superantigens, *Pathog.* **7**, 53 (2018).

- 533 15. B. A. Fields, E. L. Malchiodi, H. Li, X. Ysern, C. V Stauffacher, P. M. Schlievert, K. Karjalainen, R. A.  
534 Mariuzza, Crystal structure of a T-cell receptor  $\beta$ -chain complexed with a superantigen, *Nature* **384**, 188–192  
535 (1996).
- 536 16. L. Leder, A. Llera, P. M. Lavoie, M. I. Lebedeva, H. Li, R. P. Sékaly, G. A. Bohach, P. J. Gahr, P. M.  
537 Schlievert, K. Karjalainen, R. A. Mariuzza, A mutational analysis of the binding of staphylococcal enterotoxins B  
538 and C3 to the T cell receptor beta chain and major histocompatibility complex class II, *J. Exp. Med.* **187**, 823–833  
539 (1998).
- 540 17. A. R. Spaulding, W. Salgado-Pabón, J. A. Merriman, C. S. Stach, Y. Ji, A. N. Gillman, M. L. Peterson, P. M.  
541 Schlievert, Vaccination Against Staphylococcus aureus Pneumonia, *J. Infect. Dis.* **209**, 1955–1962 (2013).
- 542 18. Nontoxic HHS toxins (Section 73.3(d)(2)), (Federal Register, CDC, 2016).
- 543 19. J. Y. Choi, S. Shin, N. Y. Kim, W. S. Son, T. J. Kang, D. H. Song, C. H. Yu, G. H. Hur, S. T. Jeong, Y. K. Shin,  
544 A novel staphylococcal enterotoxin B subunit vaccine candidate elicits protective immune response in a mouse  
545 model, *Toxicon* **131**, 68–77 (2017).
- 546 20. R. G. Ulrich, M. A. Olson, S. Bavari, Development of engineered vaccines effective against structurally related  
547 bacterial superantigens, *Vaccine*, **16**, 1857–1864, (1998).
- 548 21. M. A. Woody, T. Krakauer, B. G. Stiles, Staphylococcal enterotoxin B mutants (N23K and F44S): Biological  
549 effects and vaccine potential in a mouse model, *Vaccine* **15**, 133–139 (1997).
- 550 22. T. S. Jardetzky, J. H. Brown, J. C. Gorga, L. J. Stern, R. G. Urban, Y. Chi, C. Stauffacher, J. L. Strominger, D.  
551 C. Wiley, Three-dimensional structure of a human class II histocompatibility molecule complexed with  
552 superantigen, *Nature* **368**, 711–718 (1994).
- 553 23. R. Ulrich, S. Bavari, M. Olson, Staphylococcal enterotoxins A and B share a common structural motif for  
554 binding class II major histocompatibility complex molecules, *Nat. Struct. Biol.* **2**, 554–560 (1995).
- 555 24. M. A. Woody, T. Krakauer, R. G. Ulrich, B. G. Stiles, Differential Immune Responses to Staphylococcal  
556 Enterotoxin B Mutations in a Hydrophobic Loop Dominating the Interface with Major Histocompatibility Complex  
557 Class II Receptors, *J. Infect. Dis.* **177**, 1013–1022 (1998).
- 558 25. J. W. Kappler, A. Herman, J. Clements, P. Marrack, Mutations defining functional regions of the superantigen  
559 staphylococcal enterotoxin B, *J. Exp. Med.* **175**, 387–396 (1992).
- 560 26. C. N. Gentry, J. R. McDonald, Acute infective endocarditis, *Infect. Dis. Crit. Care* **23**, 271–283 (2007).

- 561 27. D. A. Chistiakov, A. N. Orekhov, Y. V Bobryshev, Endothelial Barrier and Its Abnormalities in Cardiovascular  
562 Disease, *Front. Physiol.* **6**, 365 (2015).
- 563 28. C. K. Naber, Staphylococcus aureus Bacteremia: Epidemiology, Pathophysiology, and Management Strategies,  
564 *Clin. Infect. Dis.* **48**, S231–S237 (2x009).
- 565 29. T. R. Wojda, K. Comejo, A. Lin, A. Cipriano, S. Nanda, J. D. Amortegui, B. T. Wojda, S. P. Stawicki, Septic  
566 Embolism A Potentially Devasting Complication of Infective Endocarditis, In: M.S. Firstenber (Ed.), Contemporary  
567 Challenges in Endocarditis, *InTechOpen*. Chp. 8 (2016).
- 568 30. J. M. King, K. Kulhankova, C. S. Stach, B. G. Vu, W. Salgado-Pabón, Phenotypes and Virulence among  
569 Staphylococcus aureus USA100, USA200, USA300, USA400, and USA600 Clonal Lineages, *mSphere* **1**, e00071-  
570 16 (2016).
- 571 31. J. Yan, S. Li, S. Li, The role of the liver in sepsis, *Int. Rev. Immunol.* **33**, 498–510 (2014).
- 572 32. E. G. Giannini, R. Testa, V. Savarino, Liver enzyme alteration: a guide for clinicians, *CMAJ.* **172**, 367–379  
573 (2005).
- 574 33. V. Fuhrmann, B. Jäger, A. Zubkova, A. Drolz, Hypoxic hepatitis – epidemiology, pathophysiology and clinical  
575 management, *Wien. Klin. Wochenschr.* **122**, 129–139 (2010).
- 576 34. K. Werdan, S. Dietz, B. Löffler, S. Niemann, H. Bushnaq, R.-E. Silber, G. Peters, U. Müller-Werdan,  
577 Mechanisms of infective endocarditis: pathogen–host interaction and risk states, *Nat. Rev. Cardiol.* **11**, 35–50  
578 (2014).
- 579 35. K. Kulhankova, K. J. Kinney, J. M. Stach, F. A. Gourronc, I. M. Grumbach, A. J. Klingelutz, W. Salgado-  
580 Pabón, The Superantigen Toxic Shock Syndrome Toxin 1 Alters Human Aortic Endothelial Cell Function, *Infect.*  
581 *Immun.* **86**, e00848-17 (2018).
- 582 36. A. J. Brosnahan, M. M. Schaefer, W. H. Amundson, M. J. Mantz, C. A. Squier, M. L. Peterson, P. M.  
583 Schlievert, Novel toxic shock syndrome toxin-1 amino acids required for biological activity, *Biochemistry* **47**,  
584 12995–13003 (2008).
- 585 37. S. W. Tuffs, D. B. A. James, J. Bestebroer, A. C. Richards, M. I. Goncheva, M. O’Shea, B. A. Wee, K. S. Seo,  
586 P. M. Schlievert, A. Lengeling, J. A. van Strijp, V. J. Torres, J. R. Fitzgerald, The Staphylococcus aureus  
587 superantigen SEIX is a bifunctional toxin that inhibits neutrophil function, *PLoS Pathog.* **13** (2017).

- 588 38. I. D. Grumann, S. S. Scharf, S. Holtfreter, C. Kohler, L. Steil, S. Engelmann, M. Hecker, U. Völker, B. M.  
589 Bröker, Immune Cell Activation by Enterotoxin Gene Cluster (egc)-Encoded and Non- egc Superantigens from  
590 *Staphylococcus aureus*, *J. Immunol.* **181**, 5054–5061 (2008).
- 591 39. D. S. Terman, A. Serier, O. Dauwalder, C. Badiou, A. Dutour, D. Thomas, V. Brun, J. Bienvenu, J. Etienne, F.  
592 Vandenesch, G. Lina, Staphylococcal enterotoxins of the enterotoxin gene cluster (egcSEs) induce nitric oxide- and  
593 cytokine dependent tumor cell apoptosis in a broad panel of human tumor cells, *Front. Cell. Infect. Microbiol.* **4**, 38  
594 (2013).
- 595 40. D. A. Chistiakov, A. N. Orekhov, Y. V. Bobryshev, Endothelial barrier and its abnormalities in cardiovascular  
596 disease, *Front. Physiol.* **6**, 365 (2015).
- 597 41. C. Isogai, W. E. Laug, H. Shimada, P. J. Declerck, M. F. Stins, D. L. Durden, A. Erdreich-Epstein, Y. A.  
598 DeClerck, Plasminogen activator inhibitor-1 promotes angiogenesis by stimulating endothelial cell migration toward  
599 fibronectin, *Cancer Res.* **61**, 5587–5594 (2001).
- 600 42. T. Masuda, N. Hattori, T. Senoo, S. Akita, N. Ishikawa, K. Fujitaka, Y. Haruta, H. Murai, N. Kohno, SK-216, an  
601 Inhibitor of Plasminogen Activator Inhibitor-1, Limits Tumor Progression and Angiogenesis, *Mol. Cancer Ther.* **12**,  
602 2378-2388 (2013).
- 603 43. D. R. Murdoch, R. G. Corey, B. Hoen, M. Miró, V. G. Fowler, A. S. Bayer, A. W. Karchmer, L. Olaison, P. A.  
604 Pappas, P. Moreillon, S. T. Chambers, V. H. Chu, V. Falcó, D. J. Holland, P. Jones, J. L. Klein, N. J. Raymond, K.  
605 M. Read, M. F. Tripodi, R. Utili, A. Wang, C. W. Woods, C. H. Cabell, Clinical presentation, etiology, and outcome  
606 of infective endocarditis in the 21st century The international collaboration on Endocarditis-prospective cohort  
607 study, *Arch. Intern. Med.* **169**, 463–473 (2009).
- 608 44. B. G. Vu, C. S. Stach, K. Kulhankova, W. Salgado-Pabón, A. J. Klingelutz, P. M. Schlievert, E. Johnson, Ed.  
609 Chronic superantigen exposure induces systemic inflammation, elevated bloodstream endotoxin, and abnormal  
610 glucose tolerance in rabbits: Possible role in diabetes, *MBio* **6**, e02554-14 (2015).
- 611 45. J. W. Shupp, M. Jett, C. H. Pontzer, Identification of a transcytosis epitope on staphylococcal enterotoxins,  
612 *Infect. Immun.* **70**, 2178–2186 (2002).
- 613 46. N. W. M. de Jong, T. van der Horst, J. A. G. van Strijp, R. Nijland, Fluorescent reporters for markerless genomic  
614 integration in *Staphylococcus aureus*, *Sci. Rep.* **7**, 43889 (2017).

615 47. D. G. Gibson, L. Young, R.-Y. Chuang, J. C. Venter, C. A. Hutchison III, H. O. Smith, Enzymatic assembly of  
616 DNA molecules up to several hundred kilobases, *Nat. Methods* **6**, 343 (2009).

617 48. 23. M. R. Grosser, A. R. Richardson, Method for Preparation and Electroporation in *S. aureus* and *S.*  
618 *epidermidis*, *Methods in Molecular Biology*. **1373**, 51–57 (2016).

619 49. 26. J. A. Merriman, P. M. Schlievert, Identification, Purification, and Characterization of Staphylococcal  
620 Superantigens, *Methods in Molecular Biology*. **1396**, 19–33 (2016).

621 50. W. Salgado-Pabón, A. Herrera, B. G. Vu, C. S. Stach, J. A. Merriman, A. R. Spaulding, P. M. Schlievert,  
622 *Staphylococcus aureus*  $\beta$ -toxin production is common in strains with the  $\beta$ -toxin gene inactivated by bacteriophage,  
623 *J. Infect. Dis.* **210**, 784–792 (2014).

624 51. 30. J. Norrander, T. Kempe, J. Messing, Construction of improved M13 vectors using oligodeoxynucleotide-  
625 directed mutagenesis, *Gene*. **26**, 101–106 (1983).

626

627 **Acknowledgements:** We thank the University of Iowa Comparative Pathology Laboratory and  
628 University of Iowa Diagnostic Laboratories for histology and serum analysis services. **Funding:**  
629 This work was supported by National Institutes of Health (NIH) grant R01AI34692-01 to W.S-P,  
630 NIH grant 5T32AI007511-23 to P.M.T., and NIH grant T32GM008365 to K.J.K. **Author**

631 **Contributions:** K.J.K. and W.S-P conceptualized and designed experiments, analyzed the data,  
632 and wrote the manuscript. K.J.K, P.M.T, A.N.F, K.K, and W.S-P carried out in vivo rabbit  
633 experiments. K.N.G-C provided intellectual and technical support on histopathological analysis  
634 and gross pathological grading. P.M.T and A.N.F carried out in vitro experiments for the  
635 proteomics array and serum analysis. All authors reviewed the manuscript. **Competing**

636 **Interests:** The authors declare no other competing interests. **Data and materials availability:**

637 All the data needed to evaluate the conclusions in this manuscript are present in the manuscript  
638 and/or supplementary materials.

639



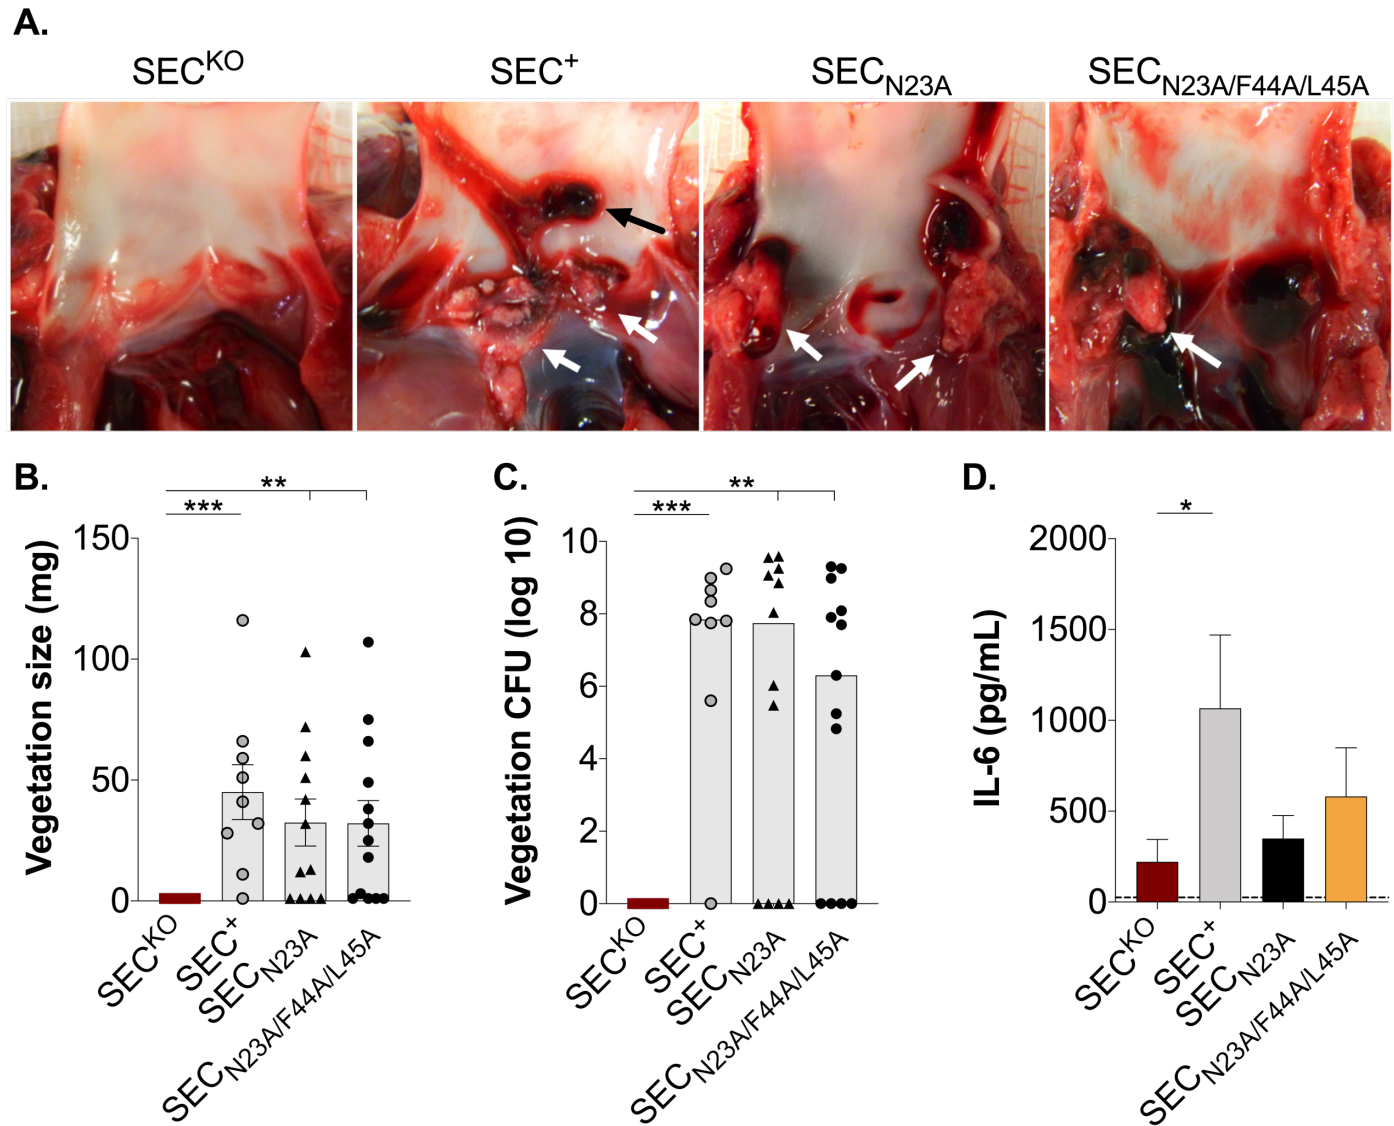

640

641 **Figure 1. SEC is required for vegetation formation independent of superantigenic activity.** (A). Representative

642 images of aortic vegetations (white arrow) (black arrow is a post mortem blood clot). (B) Total mean weights of

643 vegetations dissected from aortic valves from rabbits infected with indicated strains  $S. aureus$   $SEC^{KO}$ ,  $SEC^+$ ,

644  $SEC_{N23A}$ ,  $SEC_{N23A/F44A/L45A}$ . Error bars are represented by  $\pm$  SEM. (C) Bacterial counts recovered from aortic

645 vegetations from panel B. Bars represent median value. (D) Serum analyte levels of interleukin-6 (IL-6) from rabbits

646 48-96 hpi. Data are represented as mean ( $\pm$  SEM). The dashed line is the average analyte value of all rabbits pre-

647 infection. (B-D) Statistical significance was determined by one-way ANOVA with the Holm-Sidak multiple

648 comparison test with each SEC-producing strain compared to  $SEC^{KO}$ . (D) All groups were tested against pre-



649 infection analyte values and were statistically significant,  $p < 0.0001$ . **(B)** \*\*,  $p = 0.0037$ , \*\*\*,  $p = 0.0004$ . **(C)** \*\*,  $p$   
650 = 0.0023, \*\*\*,  $p = 0.0003$ . **(D)** \*,  $p \leq 0.0248$ .  $p$  values  $\leq 0.05$  are considered statistically significant.

**A.**

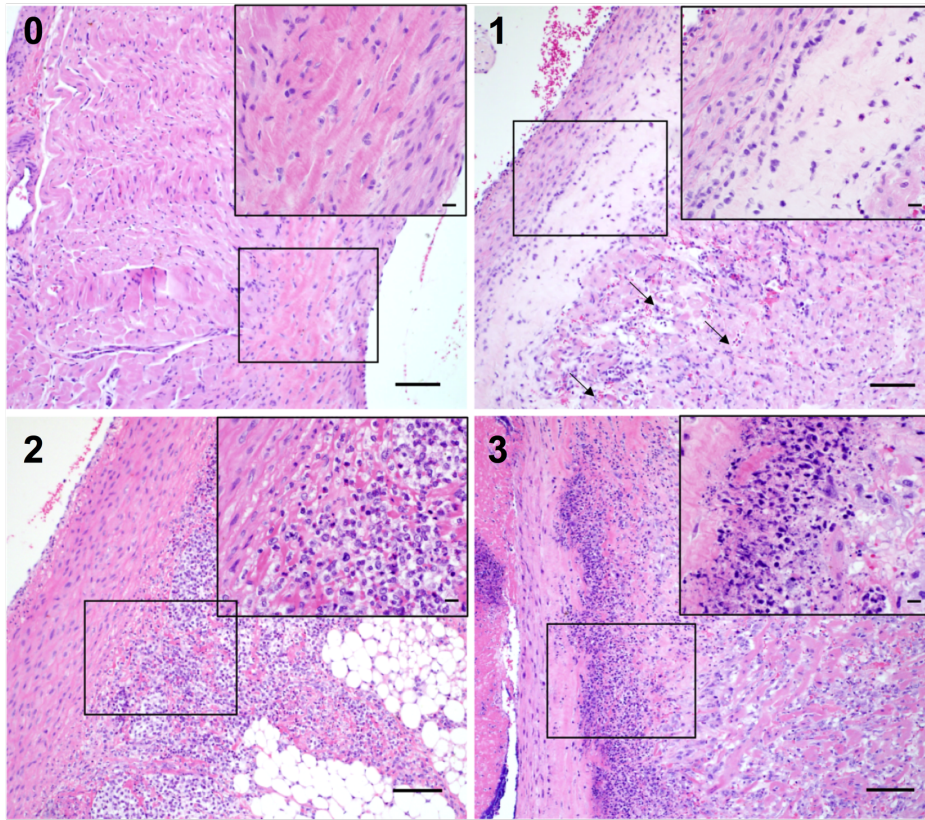

**B.**

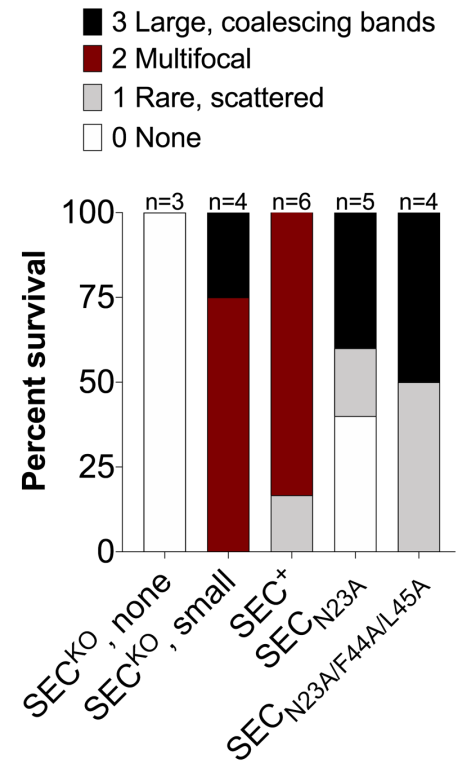

**C.**

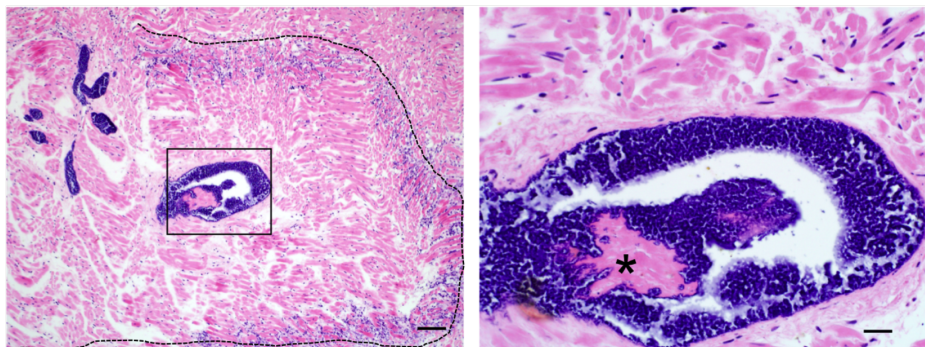

**D.**

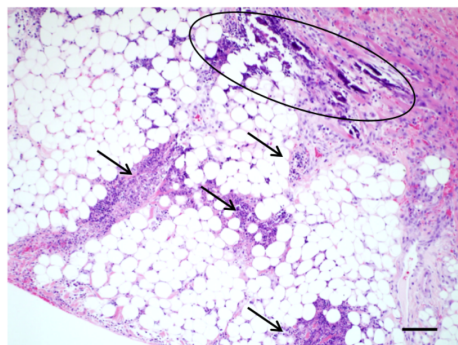

**E.**

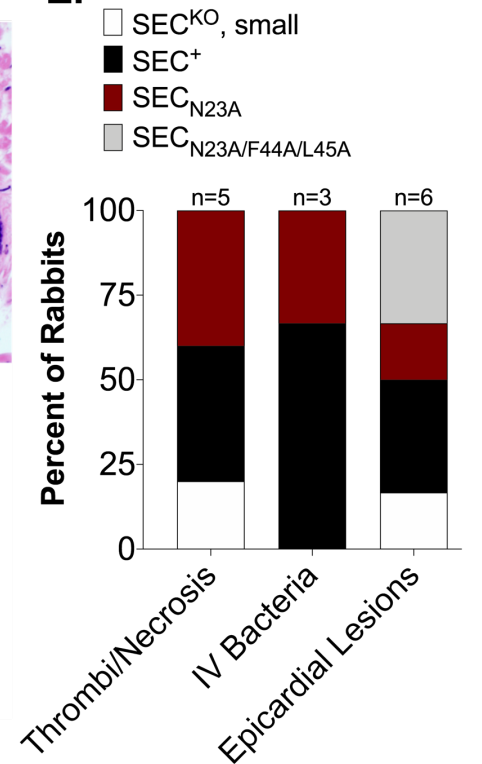

652 **Figure 2. Vegetative lesions present with bacterial infiltration, inflammation, and necrosis.** (A) Examples of  
653 histopathologic assessment of myocardial inflammation during infective endocarditis (Graded 0-3). Inflammation  
654 was graded based on the amount of inflammatory cell infiltrate noted within the myocardium. 0 = no inflammation,  
655 1 = multifocal, scattered infiltrate (arrows), 2 = coalescing foci to bands of infiltrate, 3 = wide zones of diffuse  
656 infiltrate with necrosis. Bar = 100  $\mu$ m, inset bar = 20  $\mu$ m. (B) Scoring of myocardial inflammation from HE stained  
657 images 48-96 hpi. (C) Examples of a fibrinonecrotic focus (dotted outline; note the myocardial necrosis within the  
658 outline which is a lighter pink color), (\*) a centrally located thrombus and intravascular bacteria (deeply  
659 basophilic/blue material). Left bar = 100  $\mu$ m, right bar = 20  $\mu$ m. (D) Examples of an epicardial lesion with  
660 saponification (necrosis) of epicardial fat (arrows) and a locally extensive zone of myocardial mineralization  
661 (encircled). Bar = 100  $\mu$ m. (E) Histopathologic scoring the presence or absence of cardiac pathological findings:  
662 bacterial thrombi and associated necrosis, intravascular (IV) bacteria, and epicardial fibrin and inflammation.

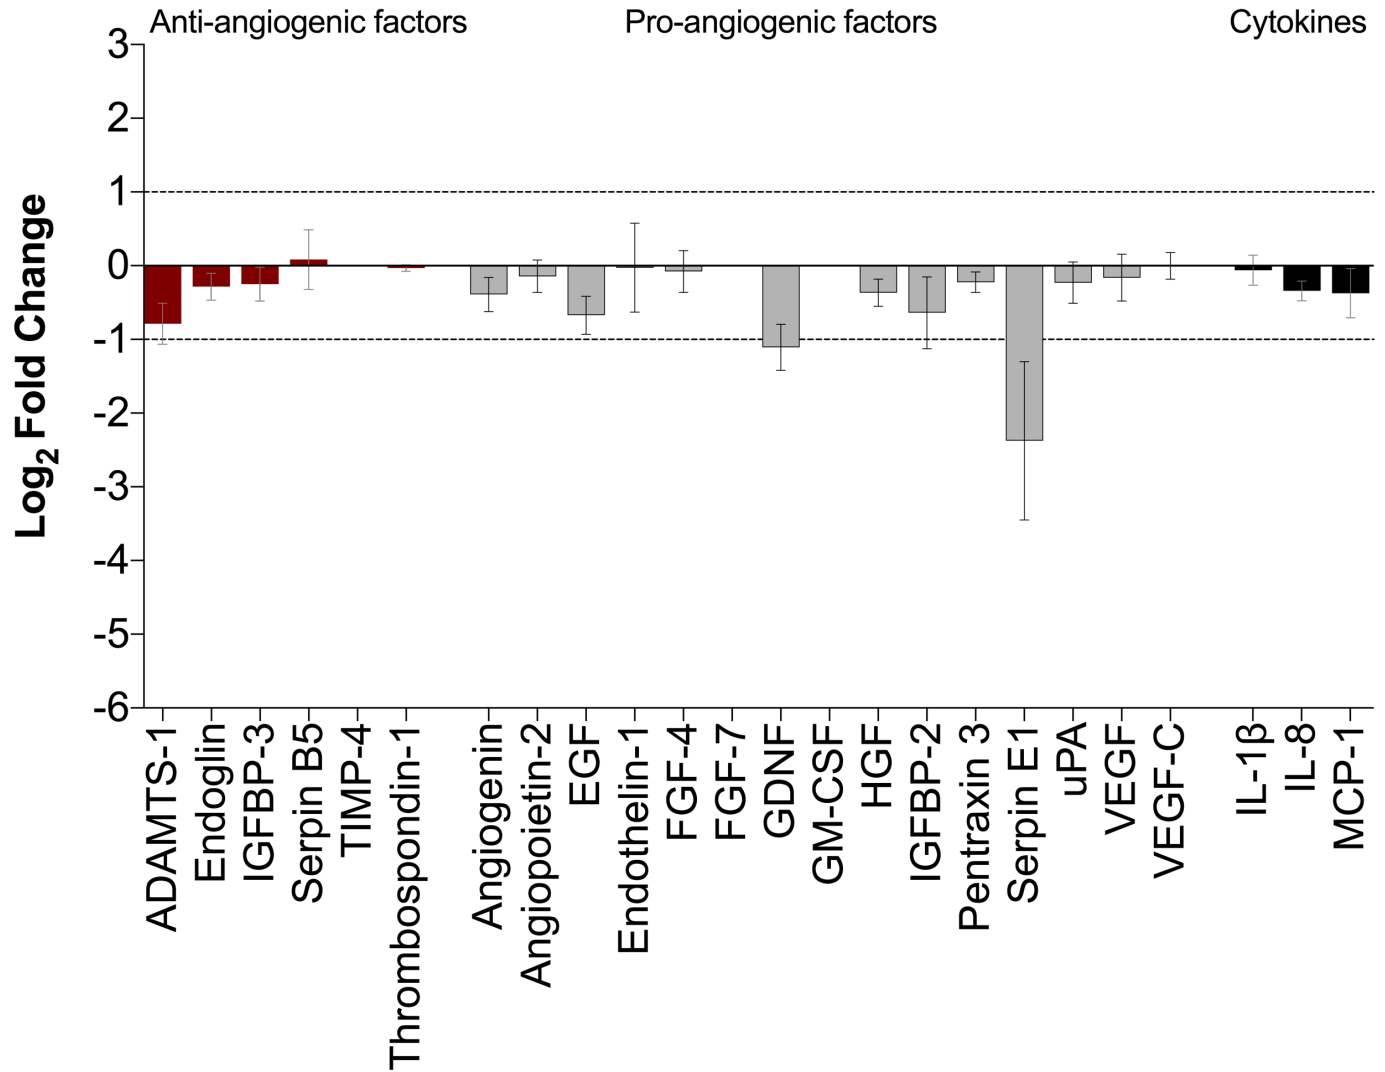

663

664 **Figure 3. SEC elicits anti-angiogenic responses in endothelial cells.** Relative protein abundance of secreted

665 angiogenic factors from iHAECs treated with 20 µg/mL of SEC for 24hrs. Data are represented as mean (± SEM).

666 Log<sub>2</sub> fold change compared to a media control. Dashed line represents threshold for relevant changes set at ± 1.

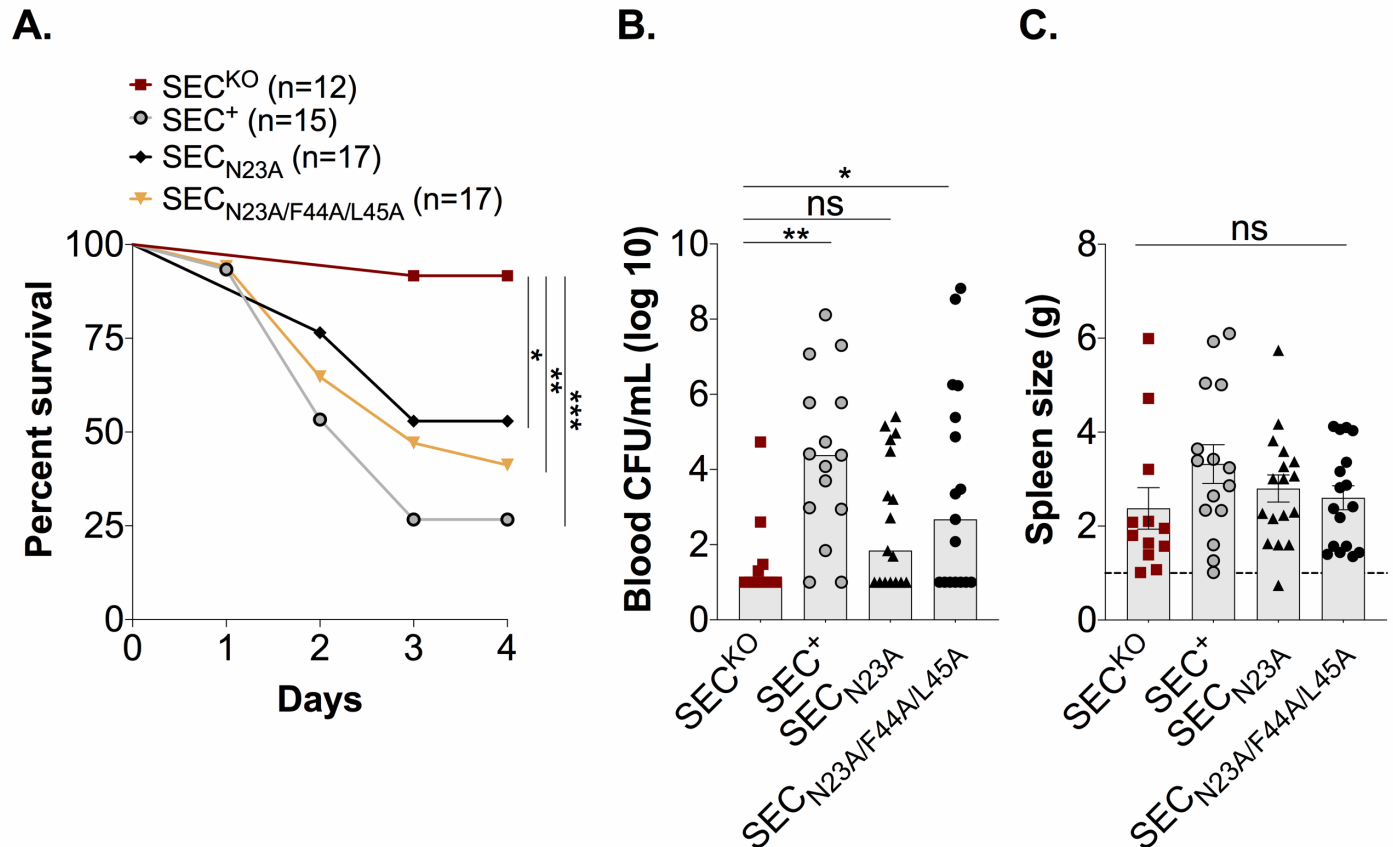

667

668 **Figure 4. Expression of SEC toxoids leads to systemic infection and lethality.** (A) Percent survival of rabbits  
 669 infected intravenously with  $2 \times 10^7$ - $4 \times 10^7$  CFU of indicated strain measured over 4 days. \*,  $p = 0.0269$ , \*\*,  $p =$   
 670  $0.0063$ , \*\*\*,  $p = 0.0007$  log-rank Mantel-Cox Test. (B) Bacterial counts per milliliter of blood recovered from  
 671 rabbits post mortem. Bars represent median value. (C) Enlargement of the spleen (splenomegaly) resulting from *S.*  
 672 *aureus* infection. Data are represented as mean ( $\pm$  SEM). The dashed line is the average spleen size of uninfected  
 673 control rabbits. (B-C) Statistical significance was determined by one-way ANOVA with the Holm-Sidak multiple  
 674 comparison test with each SEC-producing strain compared to *S. aureus* SEC<sup>KO</sup>. (B) \*,  $p = 0.0339$ , \*\*,  $p = 0.0028$ .  $p$   
 675 values  $\leq 0.05$  are considered statistically significant.



**A.**

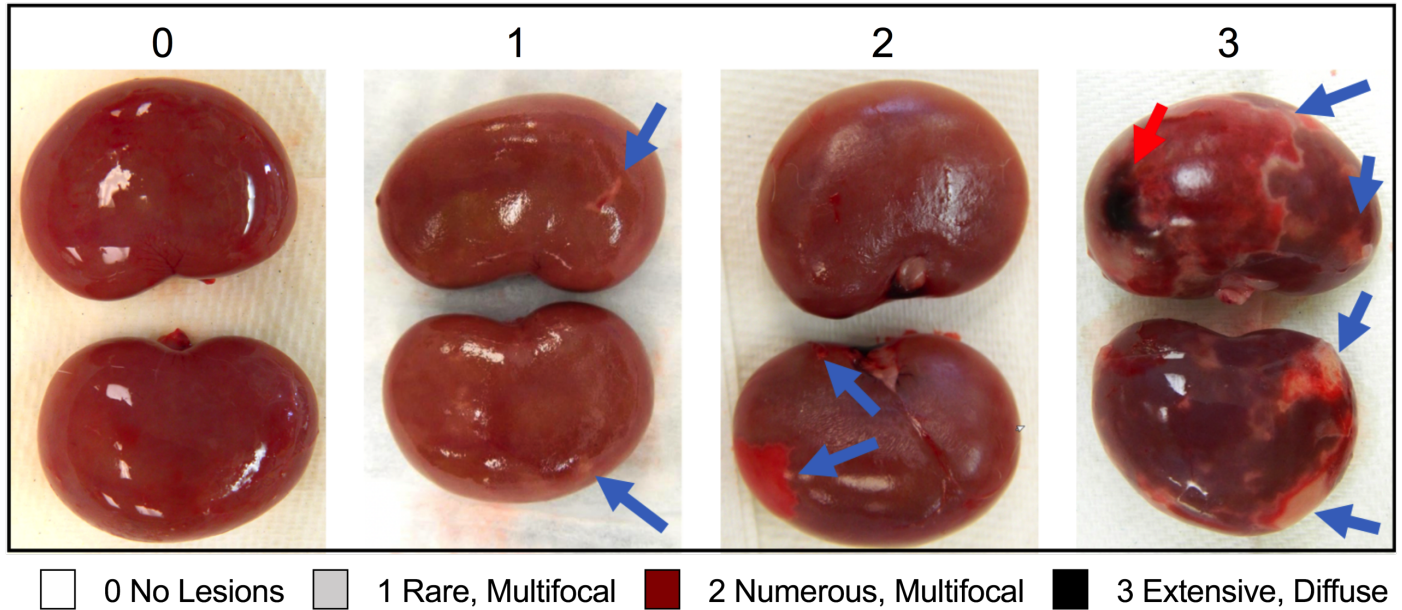

**B.**

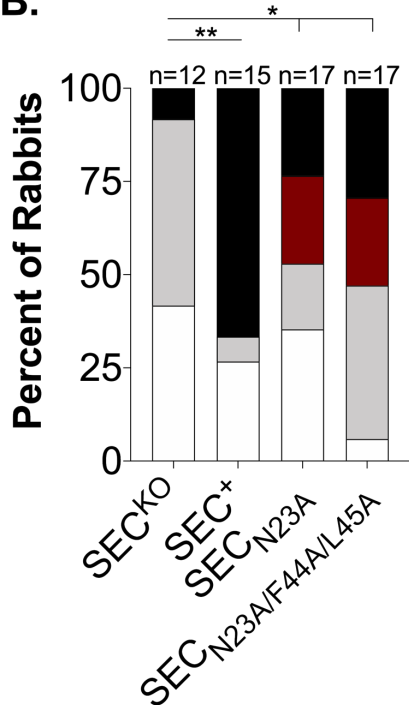

**C.**

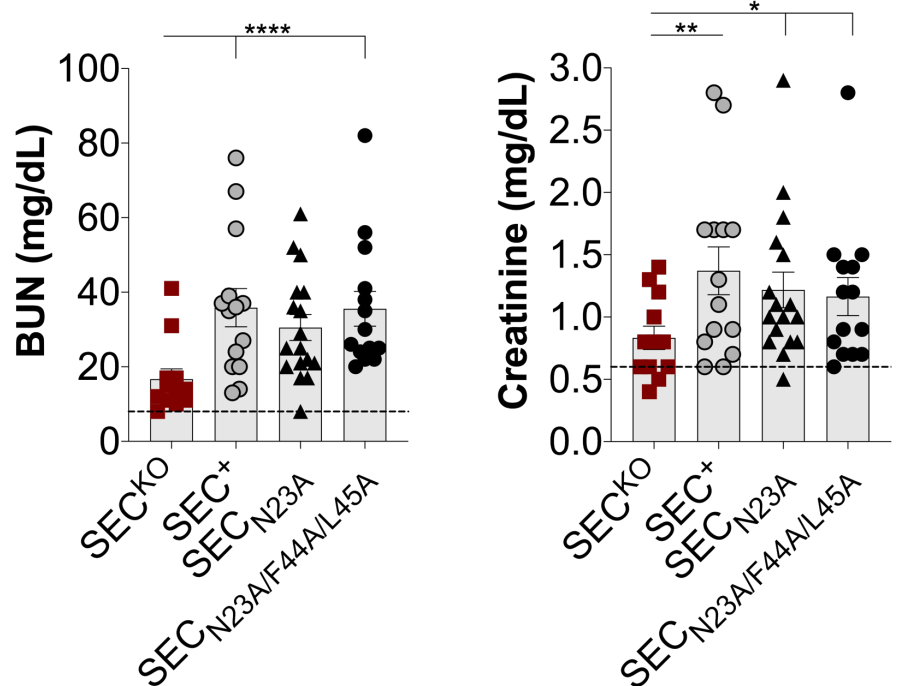

676

677 **Figure 5. SEC toxoids retain ability to cause metastatic infections and renal impairment. (A)** Kidney Gross

678 Pathology Grading Scale (Grades 0-3). 0 = no lesions, 1 = rare, small (<4mm) multifocal lesions, 2 = numerous

679 large (>5mm) multifocal lesions, 3 = extensive to coalescing to diffuse lesions. Blue arrows indicate ischemic

680 lesions, red arrow indicates a hemorrhagic lesion. **(B)** Scoring of kidney lesions post mortem. Statistical significance

681 was determined by the Fisher's exact test comparing categorical pathology grades 0-1 with grades 2-3 between *S.*  
682 *aureus* SEC<sup>KO</sup> with each SEC-producing strain. (C) Serum levels of analytes 48-96 hpi. Data are represented as  
683 mean ( $\pm$  SEM). The dashed line is the average analyte values of all rabbits pre-infection. Statistical significance was  
684 determined by one-way ANOVA with the Holm-Sidak multiple comparison test. All groups were tested against pre-  
685 infection analyte values and were statistically significant,  $p < 0.03$ . (B) \*,  $p \leq 0.0432$ , \*\*,  $p = 0.0047$ . (C) \*,  $p \leq$   
686  $0.0397$ , \*\*,  $p = 0.0046$ , \*\*\*,  $p < 0.0001$ .  $p$  values  $\leq 0.05$  are considered statistically significant.

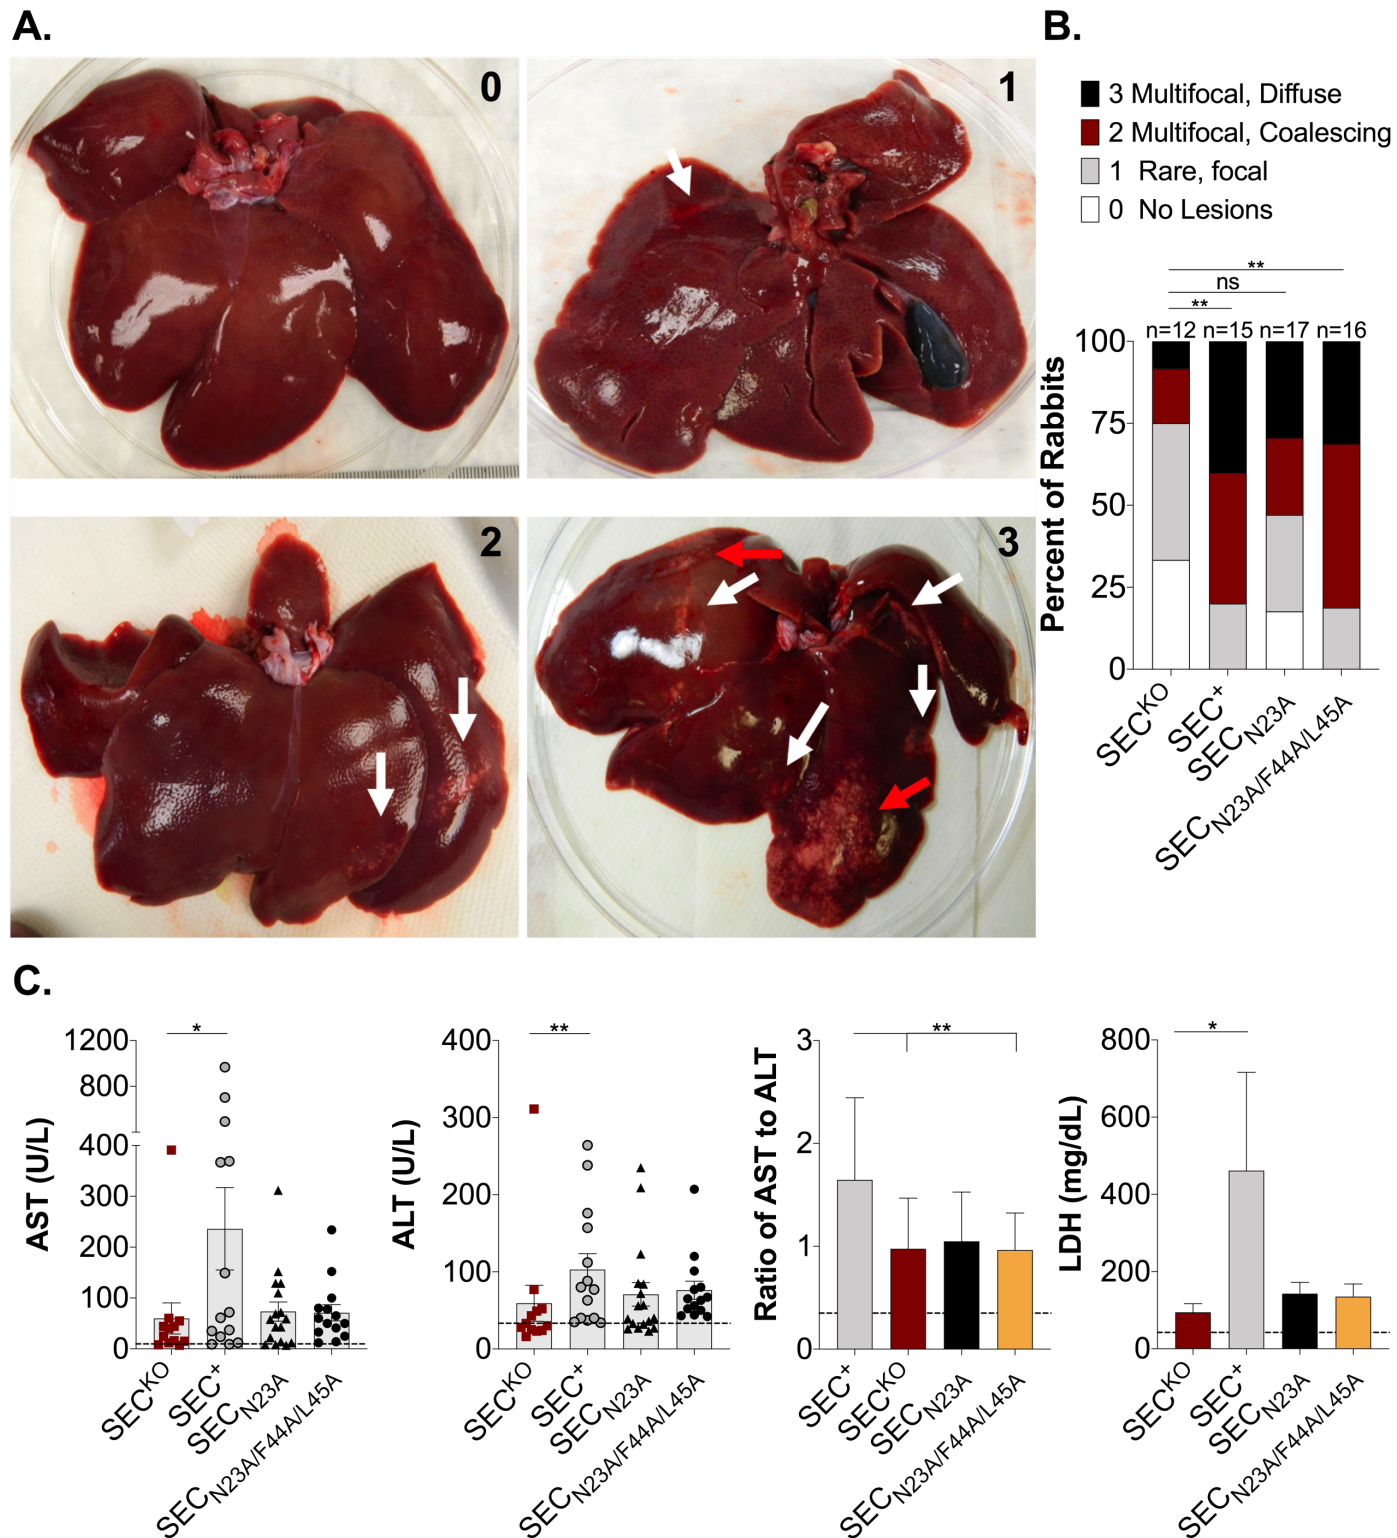

687

688 **Figure 6. Superantigenicity promotes hepatocellular damage.** (A) Liver gross pathology grading scale (grades 0-

689 3). 0 = no lesions, 1 = rare, focal streak-shaped lesions, 2 = multifocal to coalescing streak-shaped lesions, 3 =



690 multifocal streak-shaped extensive to diffuse lesions. White arrows point to streak-shaped ischemic lesions  
691 characteristic of grade 1-3, red arrows indicate wide-spread ischemic lesions characteristic of grade 3. **(B)** Scoring of  
692 liver pathology post mortem. Statistical significance was determined by the Fisher's exact test comparing categorical  
693 pathology grades 0-1 with grades 2-3 between the *S. aureus* SEC<sup>KO</sup> with each SEC-producing strain. **(C)** Serum  
694 levels of analytes 48-96 hpi. Data are represented as mean ( $\pm$  SEM). The dashed line is the average analyte or ratio  
695 value of all rabbits pre-infection. Statistical significance was determined by one-way ANOVA with the Holm-Sidak  
696 multiple comparison test with each SEC-producing strain compared to SEC<sup>KO</sup>. All groups were tested against pre-  
697 infection analyte values and were statistically significant for AST and LDH with all SEC-producing strains  
698 significant for ALT,  $p < 0.005$ . Statistical significance for AST to ALT ratio was determined by the Fisher's exact  
699 test comparing ratio values 0-1.8 to values  $> 1.8$  between the strain SEC<sup>+</sup> to superantigenic deficient groups **(B)** \*\*,  
700  $p \leq 0.0071$ . **(C)** \*,  $p \leq 0.0151$ , \*\*,  $p \leq 0.0089$ .  $p$  values  $\leq 0.05$  are considered statistically significant.
